# Supplementary material
Source: MDPI journal article supplement (https://www.mdpi.com/2073-4441/16/6/823)
Supplement: s1 [file s1]

$$f = \frac{M_R \beta \gamma}{DH}$$

$f$  - excitation force (Alford force) (N)

$M_R$  - Resistance Torque (N·m)

$\gamma$  - eccentric distance (m)

$D$  - rotor diameter (m)

$H$  – rotor height (the same as rotor length  $L$ ) (m)

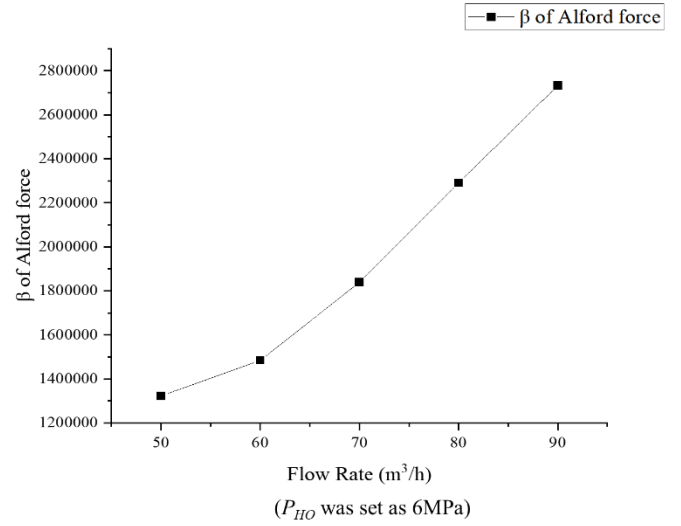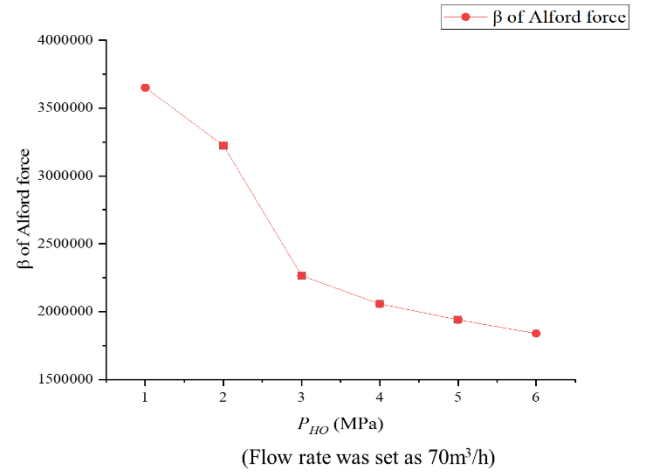

**Figure S1.** Calculation results of the efficiency factor ( $\beta$ ) of Alford force under different working conditions.
